# Supplementary material for: Photoelectrochemical H2 evolution using TiO2-coated CaFe2O4 without an external applied bias under visible light irradiation at 470 nm based on device modeling
Source: Royal Society of Chemistry journal article supplement (doi:10.1039/c7se00084g), 2017-01-01
Supplement: c7se00084g1.pdf [file c7se00084g1.pdf]

## Supporting Information

### **Photoelectrochemical H<sub>2</sub> evolution using TiO<sub>2</sub>-coated CaFe<sub>2</sub>O<sub>4</sub> without an external applied bias under visible light irradiation at 470 nm based on device modeling**

Shintaro Ida,<sup>a, c, \*</sup> Kara Kearney,<sup>b, c</sup> Takamitsu Futagami,<sup>a</sup> Hidehisa Hagiwara,<sup>a, c</sup> Takaaki Sakai,<sup>a</sup> Motonori Watanabe,<sup>c</sup> Angus Rockett<sup>c, d</sup> and Tatsumi Ishihara<sup>a, c</sup>

<sup>a</sup>Department of Applied Chemistry, Faculty of Engineering, Kyushu University, 744 Motooka, Nishi-ku, Fukuoka 819-0395, Japan

<sup>b</sup>Department of Materials Science and Engineering, University of Illinois, 1304 West Green Street, Urbana, IL, 61801, USA

<sup>c</sup>International Institute for Carbon Neutral Energy Research (I2CNER), Kyushu University, 744 Motooka, Nishi-ku, Fukuoka 819-0395, Japan

<sup>d</sup>Department of Metallurgy and Materials Engineering, Colorado School of Mines, 201 Hill Hall, 1500 Illinois Street, Golden, CO, 80401, USA

\*Author to whom correspondence should be addressed;

E-Mail: s-ida@cstf.kyushu-u.ac.jp (S.I.);

Tel.: +81-92-802-2869; Fax: +81-92-802-2871.

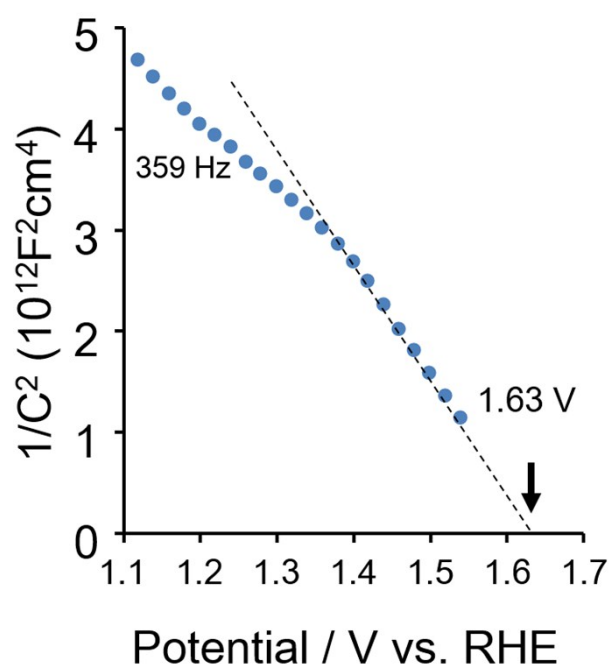

**Figure S1** Mott-Schottky plot of a bare CFO electrode in 0.1 M NaOH solution.

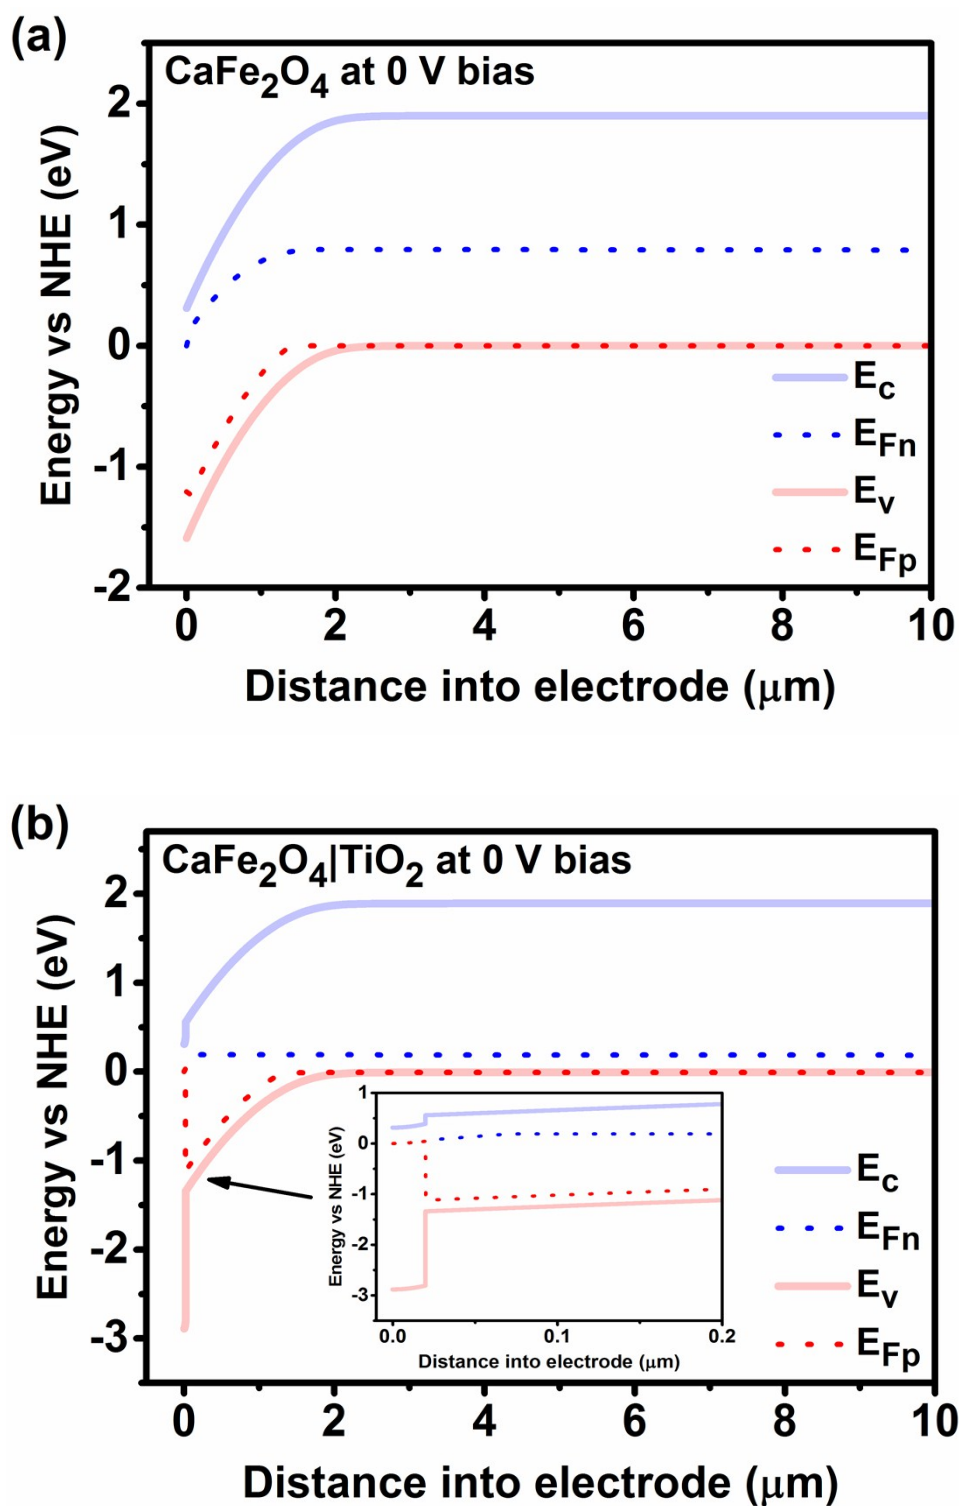

**Figure S2.** Band structures of CaFe<sub>2</sub>O<sub>4</sub> and TiO<sub>2</sub>-coated CaFe<sub>2</sub>O<sub>4</sub> electrodes at 0 V vs NHE under 470 nm excitation.

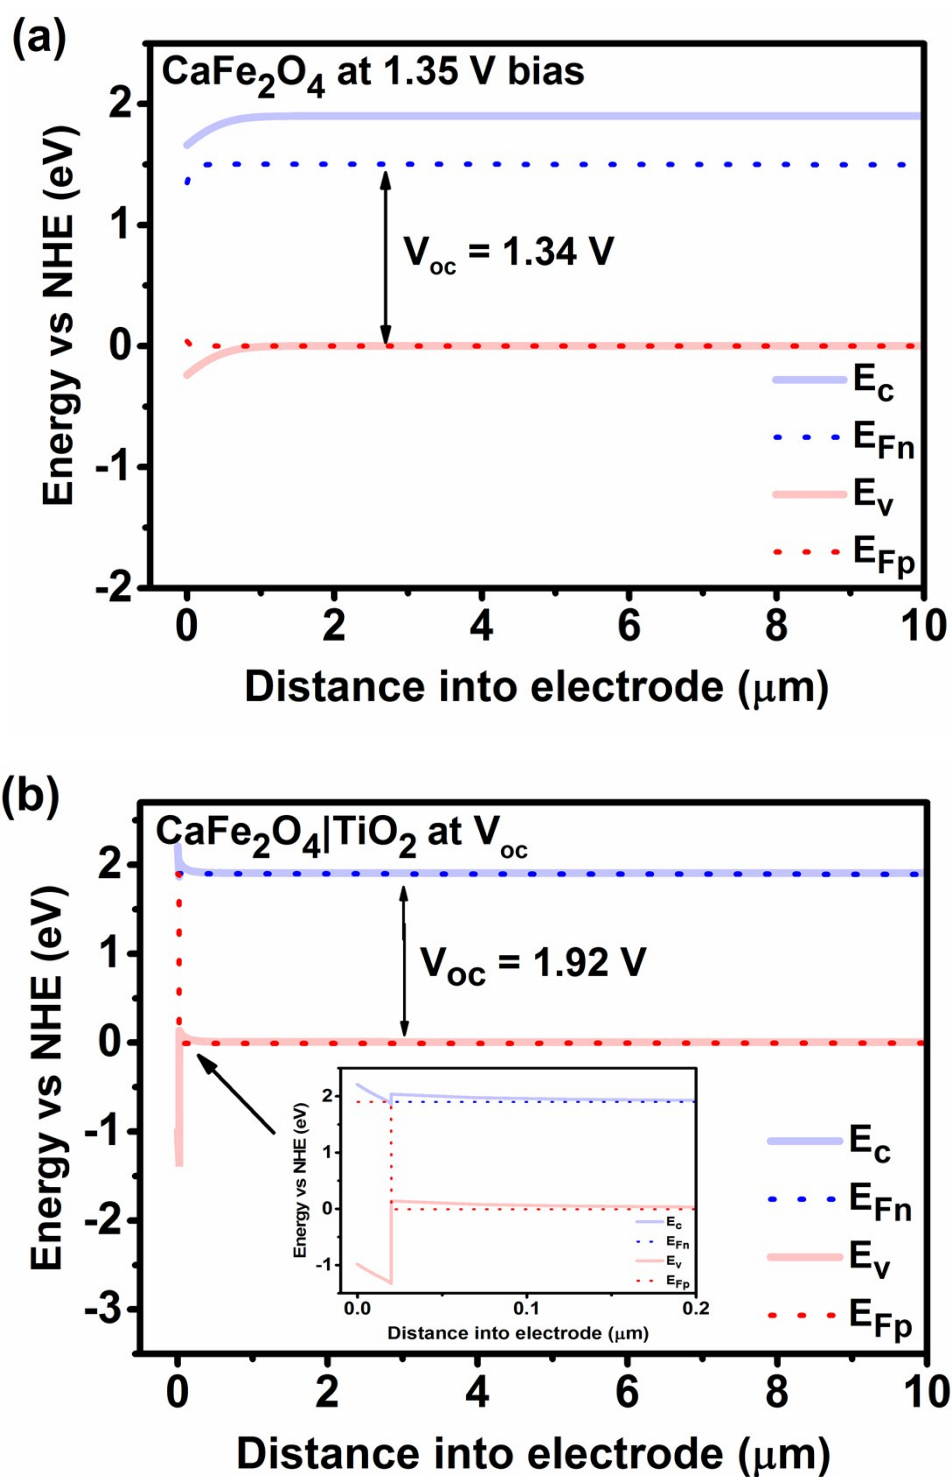

**Figure S3.** Band structures of CaFe<sub>2</sub>O<sub>4</sub> and TiO<sub>2</sub>-coated CaFe<sub>2</sub>O<sub>4</sub> electrodes at the onset potential under 470 nm excitation.

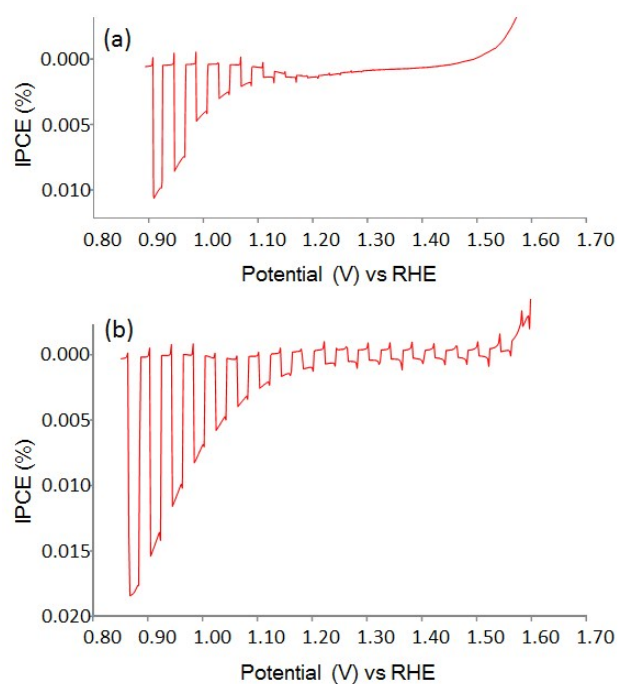

**Figure S4.** IPCE-potential curves of (a) CFO and (b) TiO<sub>2</sub>-coated CFO electrodes in 0.1 M NaOH solution under chopped 470 nm light illumination.

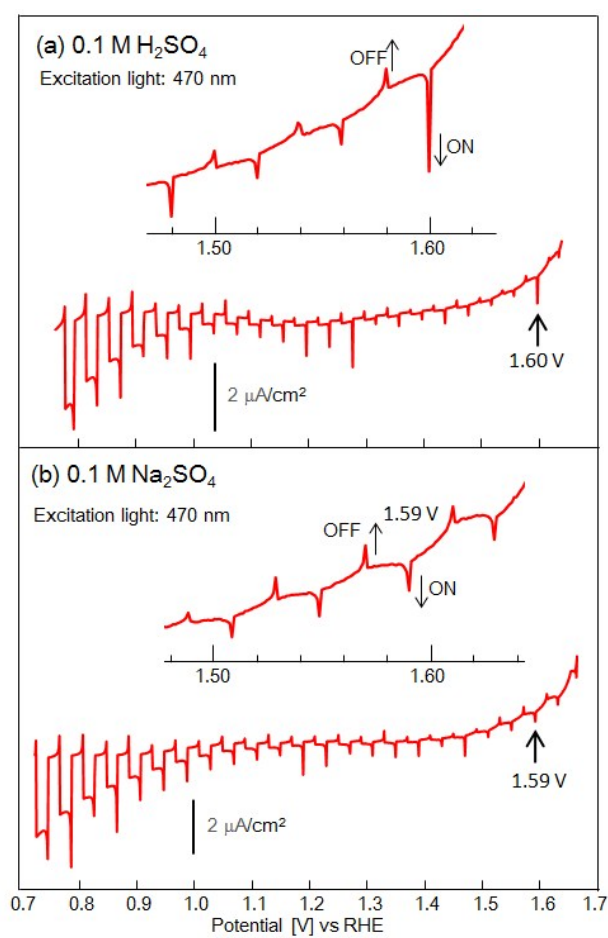

**Figure S5.** Current-potential curve of  $\text{TiO}_2$ -coated CFO electrode under chopped light illumination of 470 nm in (a)  $0.1 \text{ M H}_2\text{SO}_4$  and (b)  $0.1 \text{ M Na}_2\text{SO}_4$ .

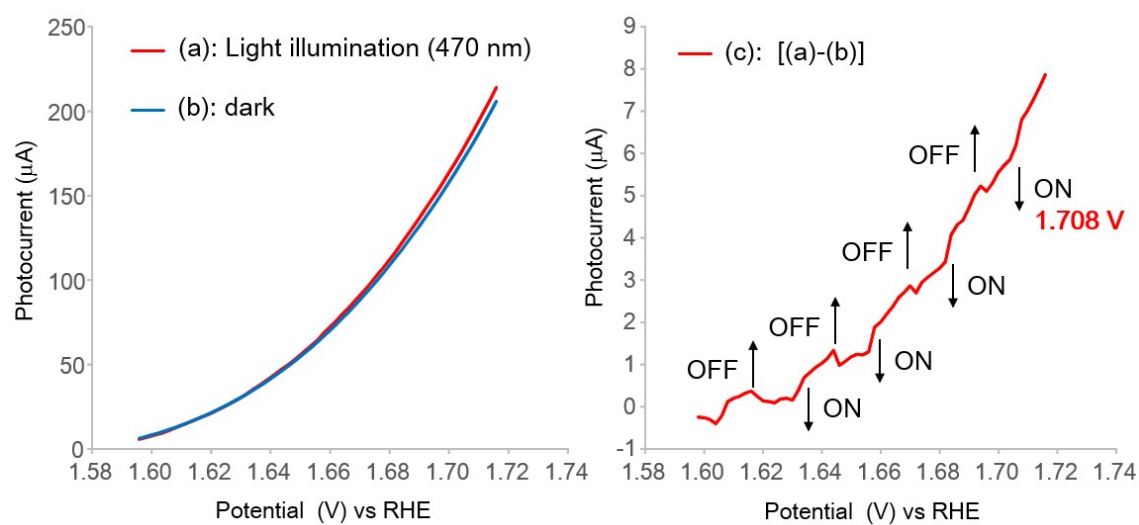

**Figure S6** Current-potential curves of  $\text{TiO}_2$ -coated CFO electrodes in 0.1 M NaOH solution under chopped light illumination (470 nm); (a) light illumination, (b) dark condition and (c) difference spectrum [(a)-(b)].

**Table S1.** Electronic parameters used as inputs for CaFe<sub>2</sub>O<sub>4</sub> and CaFe<sub>2</sub>O<sub>4</sub>/TiO<sub>2</sub> photoelectrodes.

| Electronic Parameter                        | Units                                           | CaFe <sub>2</sub> O <sub>4</sub><br>(50 $\mu$ m) | TiO <sub>2</sub><br>(20nm) |
|---------------------------------------------|-------------------------------------------------|--------------------------------------------------|----------------------------|
| Permittivity                                |                                                 | 287                                              | 50                         |
| Band Gap ( $E_g$ )                          | eV                                              | 1.9                                              | 3.2                        |
| Electron Affinity                           | eV                                              | 4.12                                             | 4.3                        |
| Conduction Band Density of States ( $N_c$ ) | cm <sup>-3</sup>                                | 10 <sup>16</sup>                                 | 10 <sup>19</sup>           |
| Valence Band Density of States ( $N_v$ )    | cm <sup>-3</sup>                                | 10 <sup>16</sup>                                 | 10 <sup>19</sup>           |
| Electron Mobility ( $\mu_n$ )               | cm <sup>2</sup> V <sup>-1</sup> s <sup>-1</sup> | 0.01                                             | 0.001                      |
| Hole Mobility ( $\mu_p$ )                   | cm <sup>2</sup> V <sup>-1</sup> s <sup>-1</sup> | 0.05                                             | 0.0001                     |
| Donor Dopant Density ( $N_d$ )              | cm <sup>-3</sup>                                | 0                                                | 10 <sup>18</sup>           |
| Acceptor Dopant Density ( $N_a$ )           | cm <sup>-3</sup>                                | 10 <sup>16</sup>                                 | 0                          |

**Table S1-2.** Defect parameters used as inputs for TiO<sub>2</sub> layer.

| Defect Parameter                    | Units            | Value                   |
|-------------------------------------|------------------|-------------------------|
| Type                                |                  | Donor-like <sup>1</sup> |
| Density                             | cm <sup>-3</sup> | 10 <sup>18</sup>        |
| Energy Level                        | eV               | 1.6                     |
| Capture Cross Section for Electrons | cm <sup>2</sup>  | 5e-12                   |
| Capture Cross Section for Holes     | cm <sup>2</sup>  | 5e-12                   |

<sup>1</sup>Discrete energetic distribution
